# Supplementary material for: Independent and Joint Impacts of Acid-Producing Diets and Depression on Physical Health among Breast Cancer Survivors
Source: MDPI journal article supplement (doi:10.3390/nu13072422), 2021-07-15
Supplement: s1 [file s1]

**Supplemental Table S1. Impact of dietary acid load and depression on physical health subscales, stratified by different age strata.**

|                          | PRAL Score (mEq/day) |                   |          | NEAP Score (mEq/day) |                   |          | Depression       |                          |
|--------------------------|----------------------|-------------------|----------|----------------------|-------------------|----------|------------------|--------------------------|
|                          | Q1                   | Q4<br>β (p-value) | P- trend | Q1                   | Q4<br>β (p-value) | P- trend | Not<br>Depressed | Depressed<br>β (p-value) |
| <b>&lt;47 years old</b>  |                      |                   |          |                      |                   |          |                  |                          |
| Physical function        | Ref                  | -1.52 (0.09)      | 0.2      | Ref                  | -1.69 (0.09)      | 0.16     | Ref              | -6.19<br>(<0.0001)       |
| Physical Role-limitation | Ref                  | 0.52 (0.81)       | 0.38     | Ref                  | 1.11 (0.62)       | 0.08     | Ref              | -20.68<br>(<0.0001)      |
| Bodily Pain              | Ref                  | 0.35 (0.81)       | 0.87     | Ref                  | -0.08 (0.96)      | 0.32     | Ref              | -11.55<br>(<0.0001)      |
| General Health           | Ref                  | 0.07 (0.95)       | 0.02     | Ref                  | -0.70 (0.58)      | 0.04     | Ref              | -12.06<br>(<0.0001)      |
| Overall Physical Health  | Ref                  | -0.09 (0.94)      | 0.32     | Ref                  | -0.29 (0.81)      | 0.07     | Ref              | -12.60<br>(<0.0001)      |
| <b>47 – 55 years old</b> |                      |                   |          |                      |                   |          |                  |                          |
| Physical function        | Ref                  | -1.69 (0.08)      | 0.37     | Ref                  | -1.77 (0.08)      | 0.06     | Ref              | -7.59<br>(<0.0001)       |
| Physical Role-limitation | Ref                  | -2.66 (0.20)      | 0.53     | Ref                  | -3.73 (0.08)      | 0.37     | Ref              | -17.98<br>(<0.0001)      |
| Bodily Pain              | Ref                  | -3.21 (0.01)      | 0.04     | Ref                  | -3.42 (0.01)      | 0.001    | Ref              | -11.84<br>(<0.0001)      |
| General Health           | Ref                  | -2.60 (0.02)      | 0.13     | Ref                  | -2.99 (0.008)     | 0.03     | Ref              | -11.58<br>(<0.0001)      |
| Overall Physical Health  | Ref                  | -2.54 (0.02)      | 0.12     | Ref                  | -2.98 (0.008)     | 0.02     | Ref              | -12.24<br>(<0.0001)      |
| <b>&gt;55 years old</b>  |                      |                   |          |                      |                   |          |                  |                          |
| Physical function        | Ref                  | -1.15 (0.40)      | 0.81     | Ref                  | -0.82 (0.57)      | 0.39     | Ref              | -6.43<br>(<0.0001)       |
| Physical Role-limitation | Ref                  | 1.25 (0.62)       | 0.18     | Ref                  | -1.49 (0.56)      | 0.18     | Ref              | -16.30<br>(<0.0001)      |
| Bodily Pain              | Ref                  | 1.55 (0.34)       | 0.80     | Ref                  | 0.32 (0.85)       | 0.40     | Ref              | -11.38<br>(<0.0001)      |
| General Health           | Ref                  | 0.78 (0.54)       | 0.44     | Ref                  | 0.20 (0.88)       | 0.49     | Ref              | -9.75<br>(<0.0001)       |
| Overall Physical Health  | Ref                  | 0.68 (0.62)       | 0.57     | Ref                  | -0.26 (0.86)      | 0.32     | Ref              | -11.05<br>(<0.0001)      |

The multivariable-adjusted models were adjusted for PRAL/NEAP and depression simultaneously, METS, age at diagnosis, menopausal status, BMI, estrogen and progesterone receptor status, smoking and pack per year status, total calorie intake, and comorbidities. PRAL and NEAP were not adjusted simultaneously in the multivariable models. PRAL denotes potential renal acid load; BMI denotes body mass index; METS denotes metabolic equivalents in minutes per week; NEAP denotes net endogenous acid production.

**Supplemental Table S2. Impact of dietary acid load and depression on physical health subscales, stratified by estrogen and progesterone receptor status.**

|                                  | PRAL Score (mEq/day) |                   |          | NEAP Score (mEq/day) |                   |          | Depression       |                          |
|----------------------------------|----------------------|-------------------|----------|----------------------|-------------------|----------|------------------|--------------------------|
|                                  | Q1                   | Q4<br>β (p-value) | P- trend | Q1                   | Q4<br>β (p-value) | P- trend | Not<br>Depressed | Depressed<br>β (p-value) |
| <b>ER+/PR+</b>                   |                      |                   |          |                      |                   |          |                  |                          |
| Physical function                | Ref                  | -1.98 (0.01)      | 0.09     | Ref                  | -1.74 (0.04)      | 0.05     | Ref              | -6.57<br>( $<0.0001$ )   |
| Physical Role-limitation         | Ref                  | -1.80 (0.28)      | 0.21     | Ref                  | -2.60 (0.13)      | 0.13     | Ref              | -17.31<br>( $<0.0001$ )  |
| Bodily Pain                      | Ref                  | -1.03 (0.35)      | 0.30     | Ref                  | -1.08 (0.34)      | 0.004    | Ref              | -11.08<br>( $<0.0001$ )  |
| General Health                   | Ref                  | -1.12 (0.20)      | 0.39     | Ref                  | -1.76 (0.05)      | 0.23     | Ref              | -10.37<br>( $<0.0001$ )  |
| Overall Physical Health          | Ref                  | -1.43 (0.11)      | 0.20     | Ref                  | -1.69 (0.07)      | 0.04     | Ref              | -11.36<br>( $<0.0001$ )  |
| <b>The group without ER+/PR+</b> |                      |                   |          |                      |                   |          |                  |                          |
| Physical function                | Ref                  | -1.89 (0.06)      | 0.24     | Ref                  | -2.17 (0.04)      | 0.03     | Ref              | -7.03<br>( $<0.0001$ )   |
| Physical Role-limitation         | Ref                  | 0.31 (0.88)       | 0.08     | Ref                  | -0.97 (0.64)      | 0.18     | Ref              | -20.18<br>( $<0.0001$ )  |
| Bodily Pain                      | Ref                  | -0.65 (0.61)      | 0.76     | Ref                  | -1.92 (0.15)      | 0.25     | Ref              | -12.64<br>( $<0.0001$ )  |
| General Health                   | Ref                  | -0.04 (0.97)      | 0.004    | Ref                  | -0.48 (0.67)      | 0.11     | Ref              | -12.93<br>( $<0.0001$ )  |
| Overall Physical Health          | Ref                  | -0.57 (0.59)      | 0.10     | Ref                  | -1.38 (0.21)      | 0.10     | Ref              | -21.09<br>( $<0.0001$ )  |

The multivariable-adjusted models were adjusted for PRAL/NEAP and depression simultaneously, METS, age at diagnosis, menopausal status, BMI, estrogen and progesterone receptor status, smoking and pack per year status, total calorie intake, and comorbidities. PRAL and NEAP were not adjusted simultaneously in the multivariable models. PRAL denotes potential renal acid load; BMI denotes body mass index; METS denotes metabolic equivalents in minutes per week; NEAP denotes net endogenous acid production.

The group without ER+/PR+ include women with EP+/PR-, ER-/PR+, ER-/PR- and unknown status.
